# Supplementary material for: Functional Circuitry Effect of Ventral Tegmental Area Deep Brain Stimulation: Imaging and Neurochemical Evidence of Mesocortical and Mesolimbic Pathway Modulation
Source: PubMed Central journal article supplement (PMC5334355; doi:10.3389/fnins.2017.00104), 2017-03-03
Supplement: Table1.pdf [file Table1.pdf]

# Supplementary Table 1

| Regions      | Sub. 1 |           |                | Sub. 2 |           |                | Sub. 3 |           |                | Sub. 4 |           |                |
|--------------|--------|-----------|----------------|--------|-----------|----------------|--------|-----------|----------------|--------|-----------|----------------|
|              | Slope  | Intercept | R <sup>2</sup> | Slope  | Intercept | R <sup>2</sup> | Slope  | Intercept | R <sup>2</sup> | Slope  | Intercept | R <sup>2</sup> |
| <b>APFC</b>  | 0.37   | -0.46     | 0.97           | 1.14   | -1.00     | 0.86           | -0.06  | 0.09      | 0.81           | 0.39   | 0.75      | 0.72           |
| <b>CD</b>    | 0.23   | 0.99      | 0.25           | 0.62   | 0.51      | 1.00           | 0.56   | -0.20     | 0.37           | 0.39   | 1.91      | 0.89           |
| <b>DLPFC</b> | 0.66   | -0.39     | 0.36           | 0.68   | -0.72     | 0.31           | 0.66   | -0.50     | 0.75           | 0.47   | 1.87      | 0.95           |
| <b>NAc</b>   | 0.61   | 0.06      | 0.83           | 0.91   | -0.26     | 0.87           | 0.94   | -0.05     | 0.45           | 0.08   | 2.23      | 0.23           |
| <b>PIMC</b>  | 0.83   | -0.54     | 0.81           | 0.91   | -0.65     | 0.78           | 0.89   | -1.47     | 0.92           | 0.21   | 1.92      | 0.48           |
| <b>PEMC</b>  | 0.53   | -0.53     | 1.00           | 1.00   | -0.87     | 0.60           | 0.80   | -0.52     | 0.78           | -0.03  | 1.93      | 0.05           |
| <b>PSSC</b>  | 0.34   | -0.33     | 1.00           | 1.00   | 0.51      | 0.84           | 0.92   | -0.07     | 0.00           | 0.39   | 0.37      | 0.69           |
| <b>PT</b>    | 0.09   | 0.96      | 0.89           | 0.94   | -0.19     | 0.96           | 0.98   | -0.01     | 0.60           | -0.20  | 1.43      | 0.99           |
